# Supplementary material for: Design, Synthesis, Biological Activity and In Silico Evaluation of Novel Phenylthiazole Derivatives as Multifunctional Skin-Whitening Agents
Source: Research Square preprint supplement (doi:10.21203/rs.3.rs-7875225/v1), 2025-11-13

Design, Synthesis, Biological Evaluation, and *In Silico* Studies of Novel Phenylthiazole Derivatives as Multifunctional Skin-Whitening Agents

Yang Xu 1, Xuhui Liang1 and Chang-Gu Hyun 1,2*

1 Jeju Inside Agency and Cosmetic Science Center, Jeju National University, Jeju 63243, Korea

2 Department of Beauty and Cosmetology, Jeju National University, Jeju 63243, Korea

* Correspondence: cghyun@jejunu.ac.kr; Tel.: +82-64-754-1803

**Supplementary materials**

[**Table S1.** Gradient elution of the mobile phase for the synthetic compounds using HPLC 5](#_Toc211341306)

[**Table S2.** The stability of the synthesized compounds in aqueous solution 5](#_Toc211341307)

[**Figure S1.** 1H NMR of the 4-phenyl-2-(2-(propan-2-ylidene)hydrazineyl)thiazole (**3a**) 6](#_Toc211341308)

[**Figure S2.** 13C NMR of the 4-phenyl-2-(2-(propan-2-ylidene)hydrazineyl)thiazole (**3a**) 6](#_Toc211341309)

[**Figure S3.** HRMS of the 4-phenyl-2-(2-(propan-2-ylidene)hydrazineyl)thiazole (**3a**) 7](#_Toc211341310)

[**Figure S4.** 1H NMR of the 4-(4-methoxyphenyl)-2-(2-(propan-2-ylidene)hydrazineyl)thiazole (**3b**) 7](#_Toc211341311)

[**Figure S5.** 13C NMR of the 4-(4-methoxyphenyl)-2-(2-(propan-2-ylidene)hydrazineyl)thiazole (**3b**) 8](#_Toc211341312)

[**Figure S6.** HRMS of the 4-(4-methoxyphenyl)-2-(2-(propan-2-ylidene)hydrazineyl)thiazole (**3b**) 8](#_Toc211341313)

[**Figure S7.** 1H NMR of the 4-(2-(2-(propan-2-ylidene)hydrazineyl)thiazol-4-yl)phenol (**3c**) 9](#_Toc211341314)

[**Figure S8.** 13C NMR of the 4-(2-(2-(propan-2-ylidene)hydrazineyl)thiazol-4-yl)phenol (**3c**) 9](#_Toc211341315)

[**Figure S9.** HRMS of the 4-(2-(2-(propan-2-ylidene)hydrazineyl)thiazol-4-yl)phenol (**3c**) 10](#_Toc211341316)

[**Figure S10.** 1H NMR of the 3-(2-(2-(propan-2-ylidene)hydrazineyl)thiazol-4-yl)phenol (**3d**) 10](#_Toc211341317)

[**Figure S11.** 13C NMR of the 3-(2-(2-(propan-2-ylidene)hydrazineyl)thiazol-4-yl)phenol (**3d**) 11](#_Toc211341318)

[**Figure S12.** HRMS of the 3-(2-(2-(propan-2-ylidene)hydrazineyl)thiazol-4-yl)phenol (**3d**) 11](#_Toc211341319)

[**Figure S13.** 1H NMR of the 2-(2-(2-(propan-2-ylidene)hydrazineyl)thiazol-4-yl)phenol (**3e**) 12](#_Toc211341320)

[**Figure S14.** 13C NMR of the 2-(2-(2-(propan-2-ylidene)hydrazineyl)thiazol-4-yl)phenol (**3e**) 12](#_Toc211341321)

[**Figure S15.** HRMS of the 2-(2-(2-(propan-2-ylidene)hydrazineyl)thiazol-4-yl)phenol (**3e**) 13](#_Toc211341322)

[**Figure S16.** 1H NMR of the 4-(4-fluorophenyl)-2-(2-(propan-2-ylidene)hydrazineyl)thiazole (**3f**) 13](#_Toc211341323)

[**Figure S17.** 13C NMR of the 4-(4-fluorophenyl)-2-(2-(propan-2-ylidene)hydrazineyl)thiazole (**3f**) 14](#_Toc211341324)

[**Figure S18.** HRMS of the 4-(4-fluorophenyl)-2-(2-(propan-2-ylidene)hydrazineyl)thiazole (**3f**) 14](#_Toc211341325)

[**Figure S19.** 1H NMR of the 4-fluoro-2-(2-(2-(propan-2-ylidene)hydrazineyl)thiazol-4-yl)phenol (**3g**) 15](#_Toc211341326)

[**Figure S20.** 13C NMR of the 4-fluoro-2-(2-(2-(propan-2-ylidene)hydrazineyl)thiazol-4-yl)phenol (**3g**) 15](#_Toc211341327)

[**Figure S21.** HRMS of the 4-fluoro-2-(2-(2-(propan-2-ylidene)hydrazineyl)thiazol-4-yl)phenol (**3g**) 16](#_Toc211341328)

[**Figure S22.** 1H NMR of the 4-(3,4-dimethoxyphenyl)-2-(2-(propan-2-ylidene)hydrazineyl)thiazole (**3h**) 16](#_Toc211341329)

[**Figure S23.** 13C NMR of the 4-(3,4-dimethoxyphenyl)-2-(2-(propan-2-ylidene)hydrazineyl)thiazole (**3h**) 17](#_Toc211341330)

[**Figure S24.** HRMS of the 4-(3,4-dimethoxyphenyl)-2-(2-(propan-2-ylidene)hydrazineyl)thiazole (**3h**) 17](#_Toc211341331)

[**Figure S25.** Antimelanogenic effects of compounds in B16F10 melanoma cells. 18](#_Toc211341332)

[**Figure S26.** Synthesis compounds **3a**-**3h** on NO producton and cell viability in LPS-induced RAW 264.7macrophage cells. 18](#_Toc211341333)

[**Figure S27.** The inhibition percentage of DPPH by the synthesized compounds 18](#_Toc211341334)

[**Figure S28.** HPLC chromatograms for stability evaluation of the synthesized compounds 19](#_Toc211341335)

# **Table S1.** Gradient elution of the mobile phase for the synthetic compounds using HPLC

The mobile phase consisted of solvent A (0.1% acetic acid in water) and solvent B (acetonitrile). Gradient elution was performed at a flow rate of 1.0 mL/min.

| **Time** | **Solution (A) %** | **Solution (B) %** |
| --- | --- | --- |
| 0 to 10 min | 90 | 10 |
| 10 to 20 min | 60 | 40 |
| 20 to 28 min | 30 | 70 |
| 28 to 30 min | 5 | 95 |
| 30 to 40 min | 90 | 10 |

# **Table S2.** The stability of the synthesized compounds in aqueous solution

Each compound was dissolved in an acetonitrile–water (1:1, v/v) mixture, followed by sonication and filtration through a 0.22 μm membrane filter prior to analysis. The detection wavelength was set at 248 nm. Peak areas were quantified using the minimum area integration method.

| **Compounds** | **0 day** | | **1 month** | | **Degradation**  **(%)** |
| --- | --- | --- | --- | --- | --- |
| **RT** (min) | **Area** (%) | **RT** (min) | **Area** (%) |
| 3a | 30.837 | 95.60 | 30.862 | 87.50 | 8.10 |
| 3b | 30.462 | 95.36 | 30.482 | 85.48 | 9.88 |
| 3c | 26.237 | 96.93 | 26.205 | 87.31 | 9.62 |
| 3d | 31.912 | 97.44 | 31.875 | 85.36 | 12.08 |
| 3e | 26.813 | 96.73 | 26.780 | 85.21 | 11.52 |
| 3f | 31.265 | 95.59 | 31.213 | 88.81 | 6.78 |
| 3g | 32.185 | 96.68 | 32.184 | 84.32 | 12.36 |
| 3h | 28.815 | 94.80 | 28.775 | 88.46 | 6.36 |

# **Figure S1.** 1H NMR of the 4-phenyl-2-(2-(propan-2-ylidene)hydrazineyl)thiazole (**3a**)


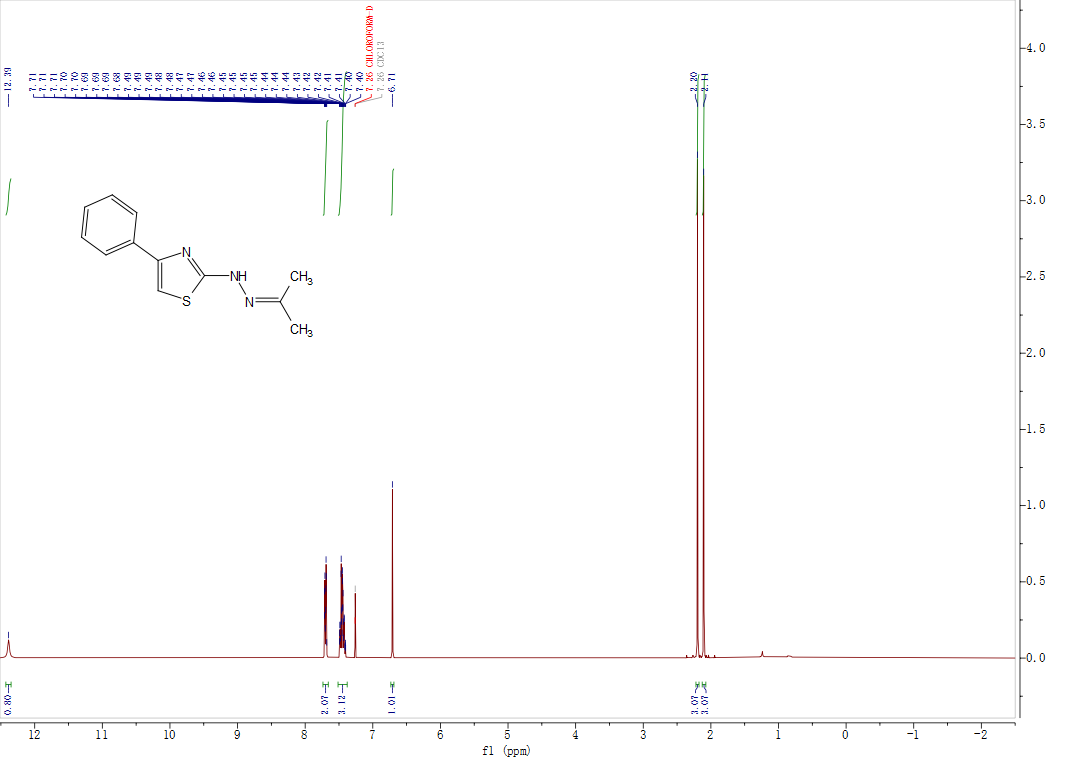


# **Figure S2.** 13C NMR of the 4-phenyl-2-(2-(propan-2-ylidene)hydrazineyl)thiazole (**3a**)


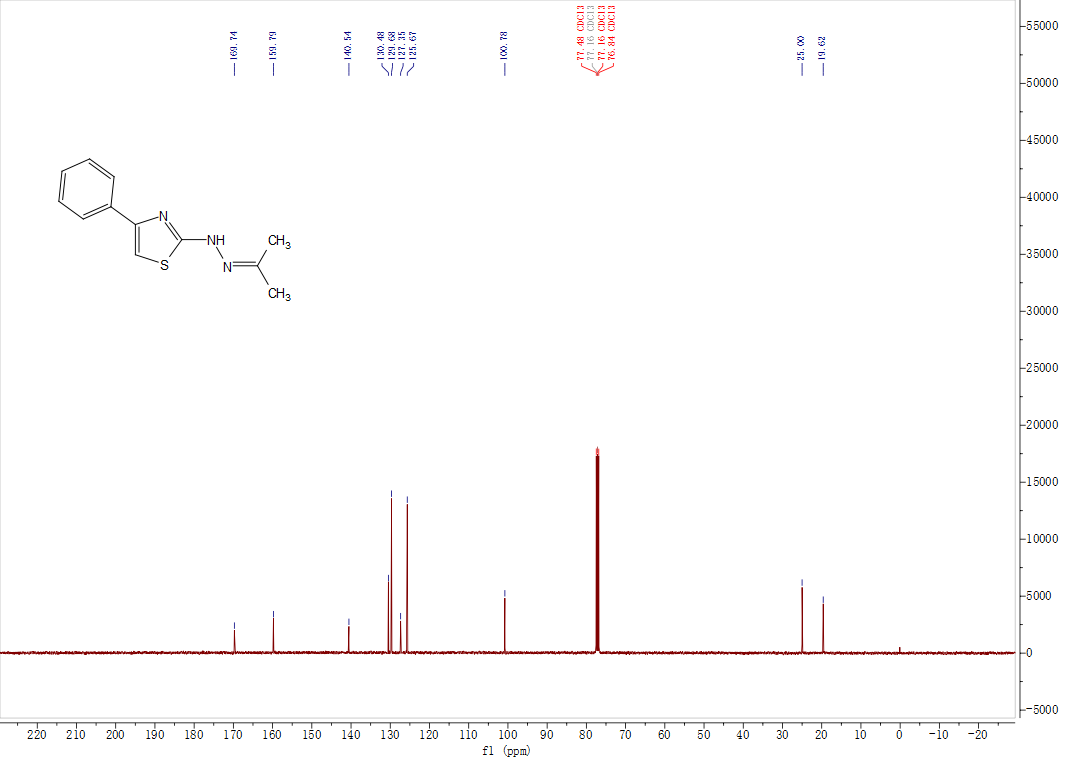


# **Figure S3.** HRMS of the 4-phenyl-2-(2-(propan-2-ylidene)hydrazineyl)thiazole (**3a**)

# **Figure S4.** 1H NMR of the 4-(4-methoxyphenyl)-2-(2-(propan-2-ylidene)hydrazineyl)thiazole (**3b**)


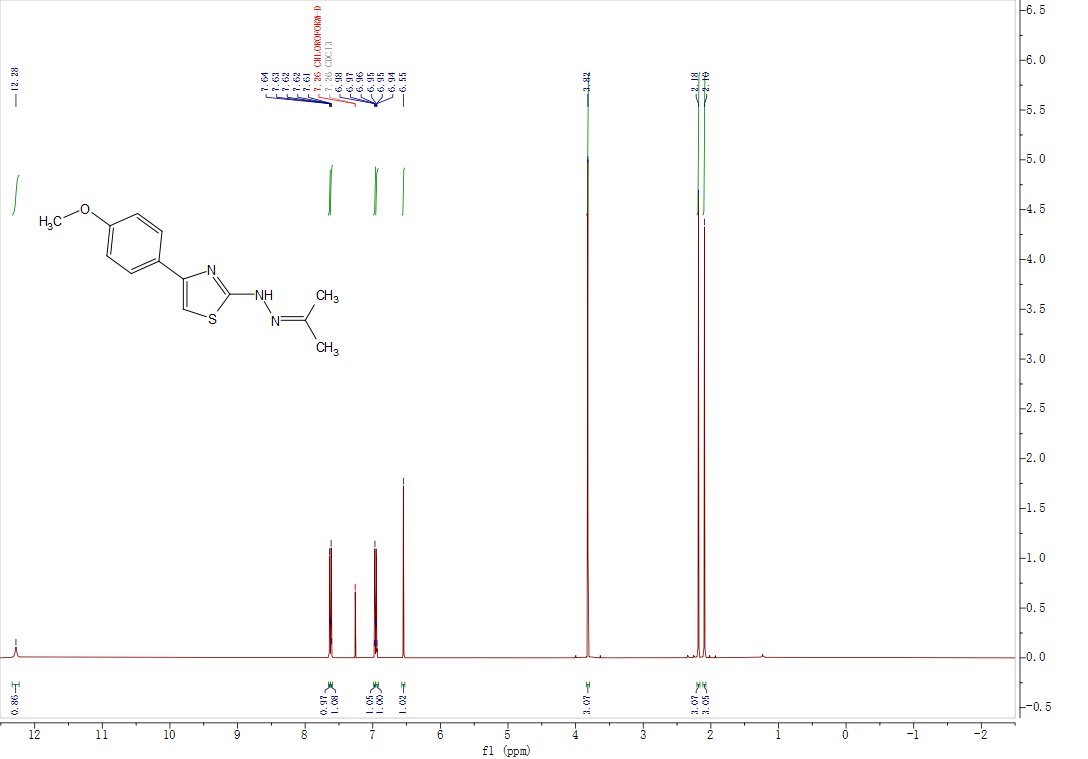


# **Figure S5.** 13C NMR of the 4-(4-methoxyphenyl)-2-(2-(propan-2-ylidene)hydrazineyl)thiazole (**3b**)


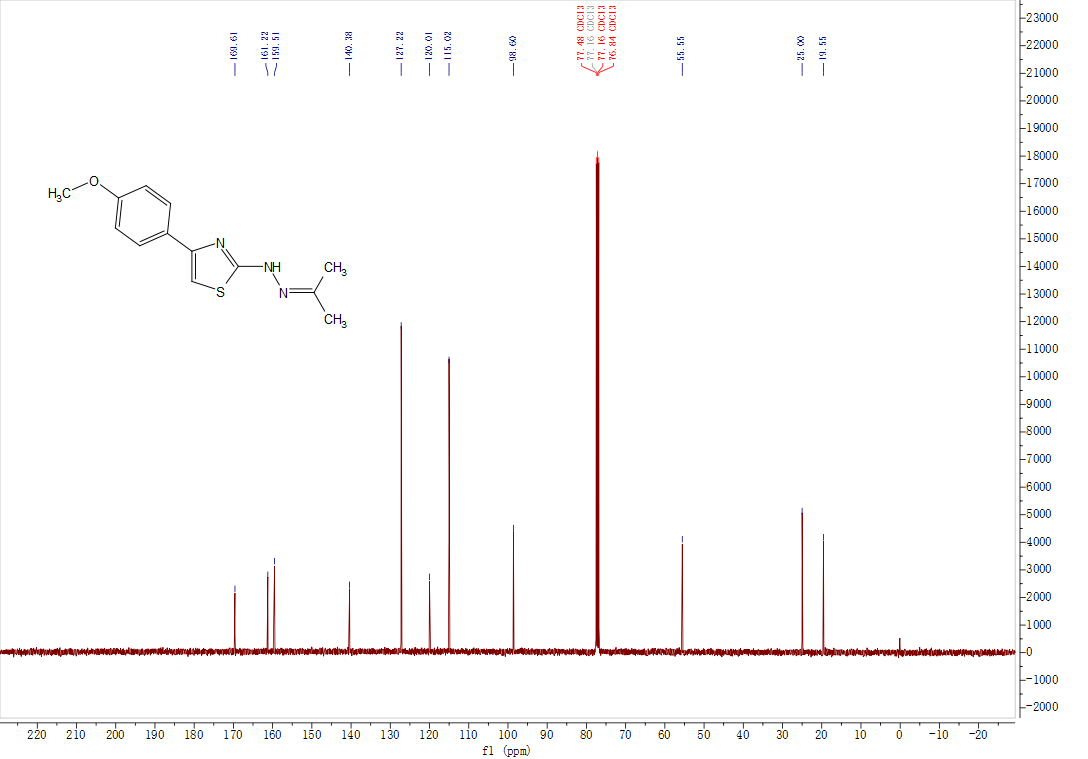


# **Figure S6.** HRMS of the 4-(4-methoxyphenyl)-2-(2-(propan-2-ylidene)hydrazineyl)thiazole (**3b**)

# **Figure S7.** 1H NMR of the 4-(2-(2-(propan-2-ylidene)hydrazineyl)thiazol-4-yl)phenol (**3c**)


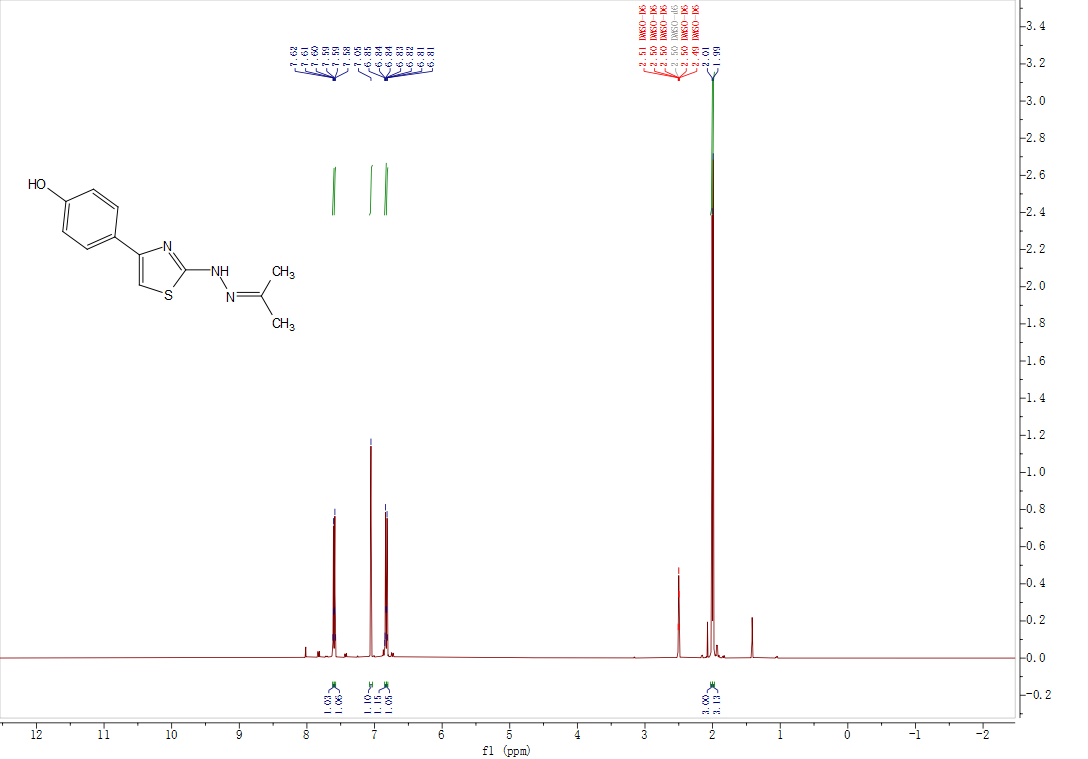


# **Figure S8.** 13C NMR of the 4-(2-(2-(propan-2-ylidene)hydrazineyl)thiazol-4-yl)phenol (**3c**)


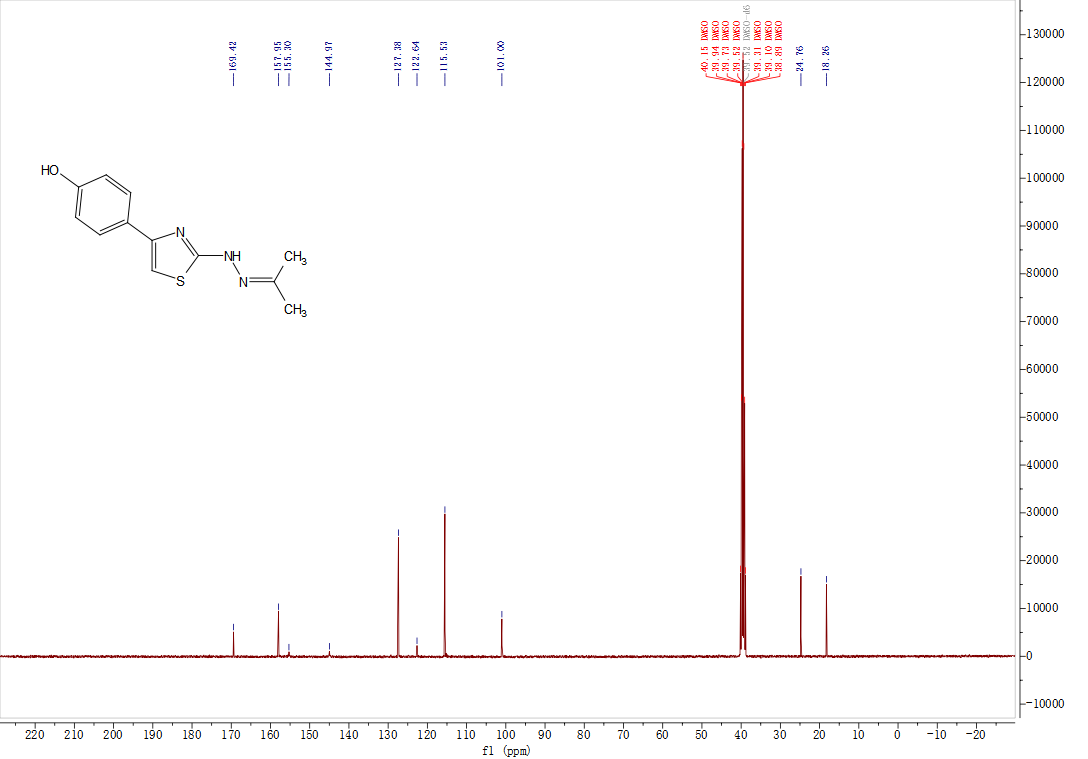


# **Figure S9.** HRMS of the 4-(2-(2-(propan-2-ylidene)hydrazineyl)thiazol-4-yl)phenol (**3c**)

# **Figure S10.** 1H NMR of the 3-(2-(2-(propan-2-ylidene)hydrazineyl)thiazol-4-yl)phenol (**3d**)


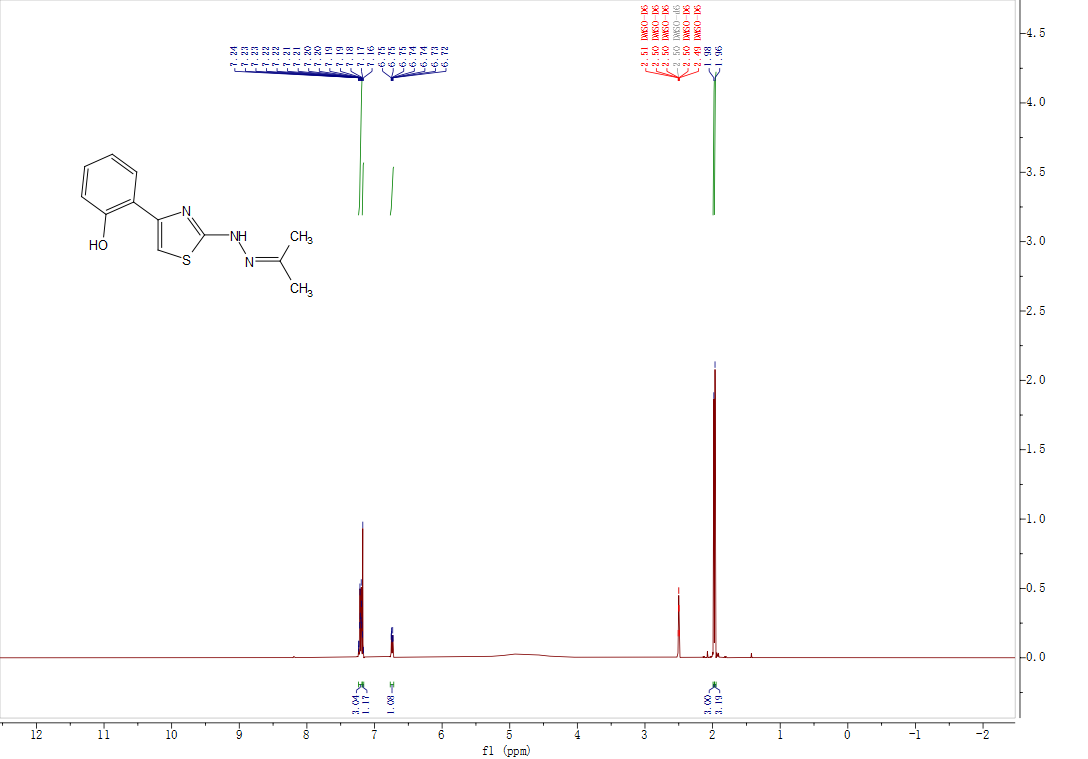


# **Figure S11.** 13C NMR of the 3-(2-(2-(propan-2-ylidene)hydrazineyl)thiazol-4-yl)phenol (**3d**)


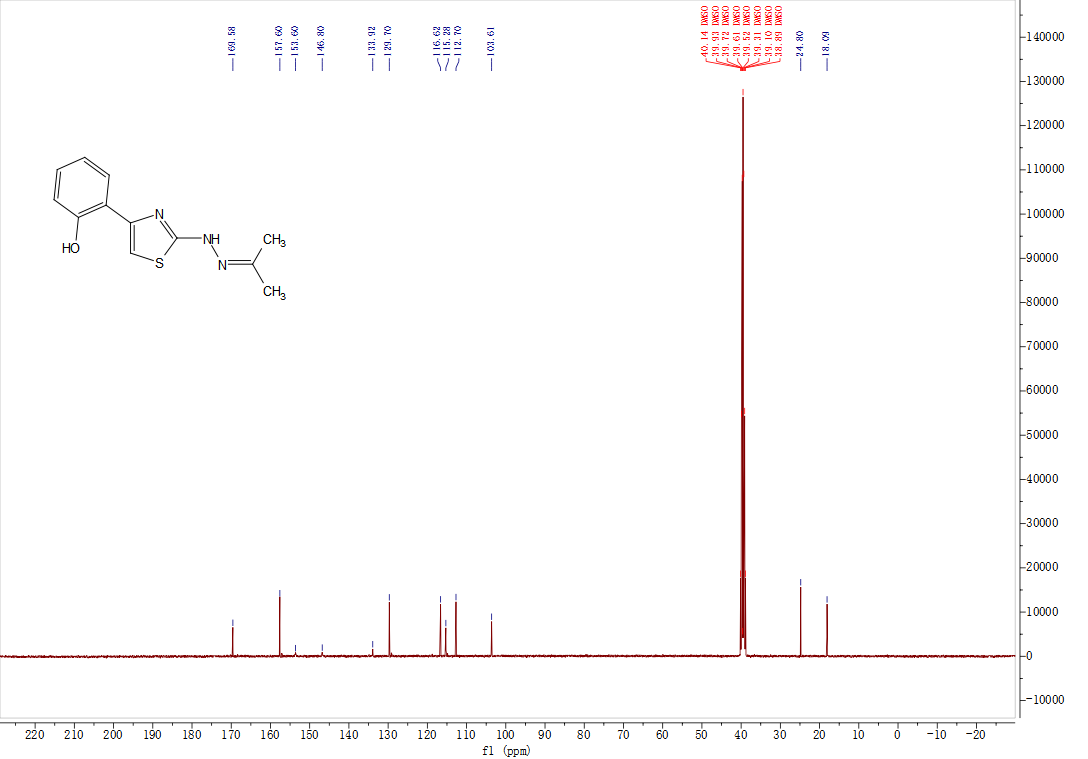


# **Figure S12.** HRMS of the 3-(2-(2-(propan-2-ylidene)hydrazineyl)thiazol-4-yl)phenol (**3d**)

# **Figure S13.** 1H NMR of the 2-(2-(2-(propan-2-ylidene)hydrazineyl)thiazol-4-yl)phenol (**3e**)


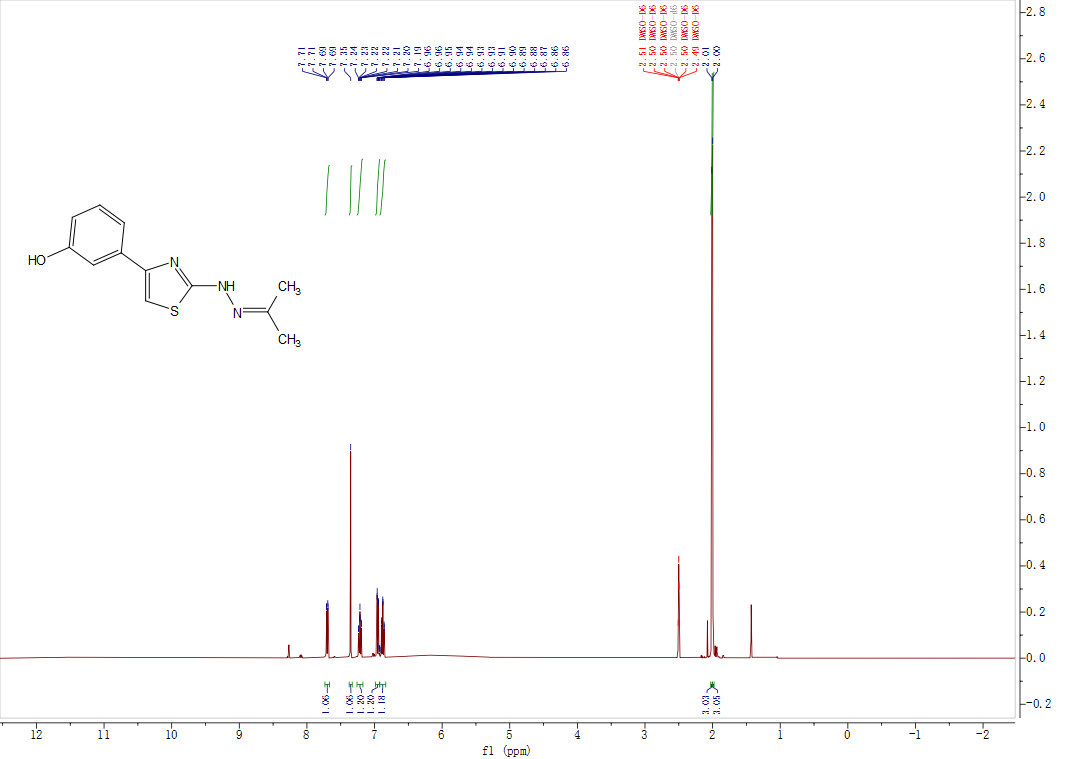


# **Figure S14.** 13C NMR of the 2-(2-(2-(propan-2-ylidene)hydrazineyl)thiazol-4-yl)phenol (**3e**)


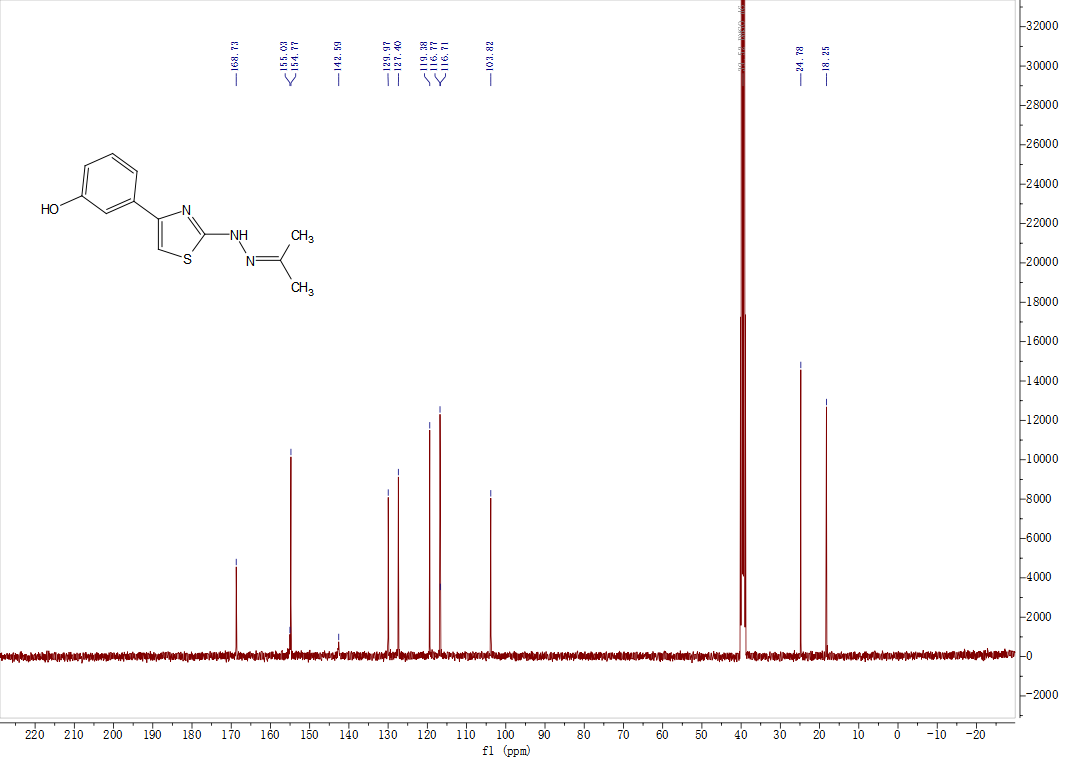


# **Figure S15.** HRMS of the 2-(2-(2-(propan-2-ylidene)hydrazineyl)thiazol-4-yl)phenol (**3e**)

# **Figure S16.** 1H NMR of the 4-(4-fluorophenyl)-2-(2-(propan-2-ylidene)hydrazineyl)thiazole (**3f**)


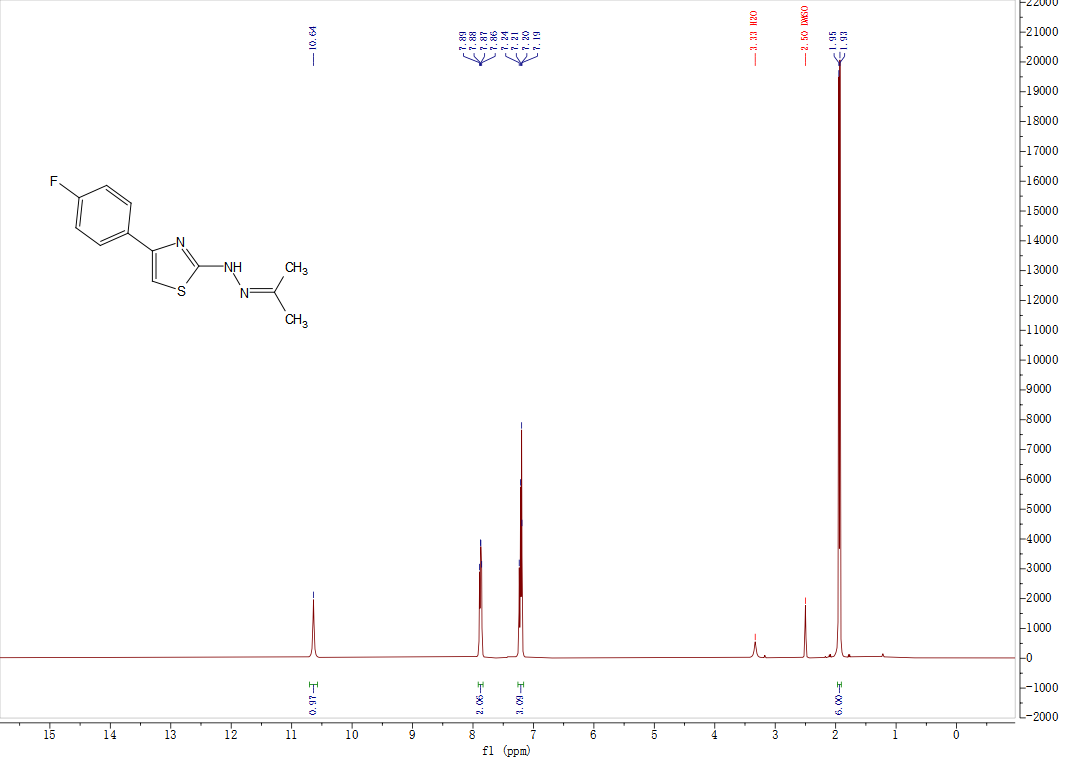


# **Figure S17.** 13C NMR of the 4-(4-fluorophenyl)-2-(2-(propan-2-ylidene)hydrazineyl)thiazole (**3f**)


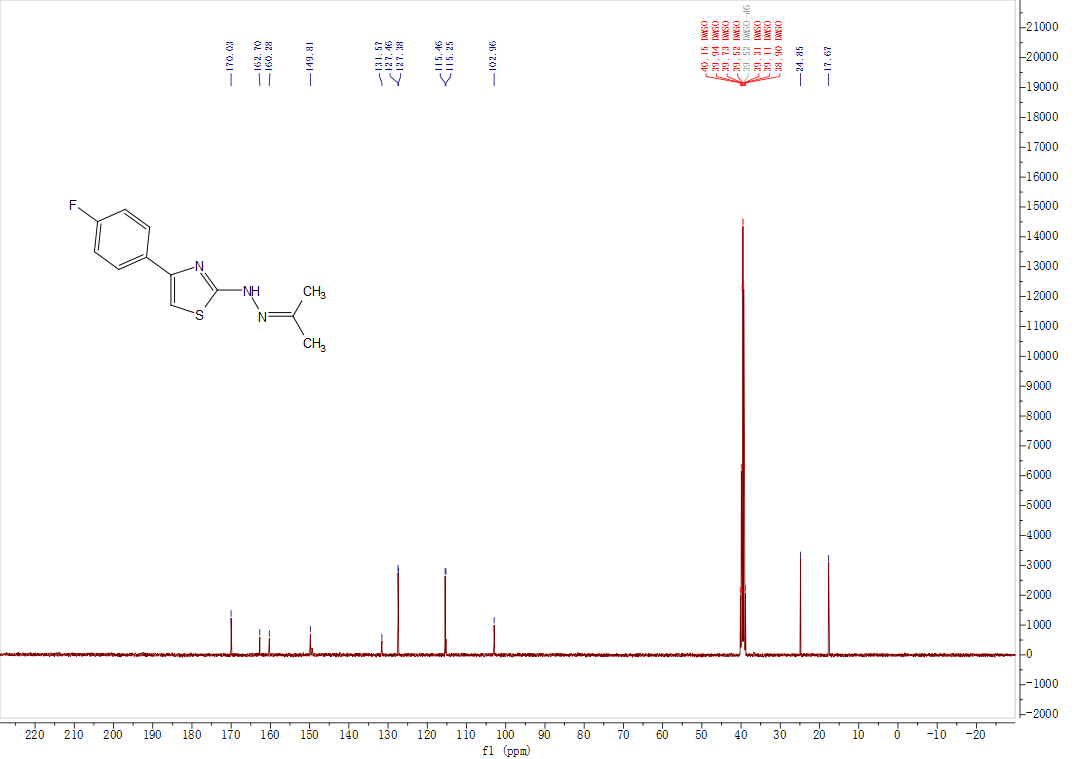


# **Figure S18.** HRMS of the 4-(4-fluorophenyl)-2-(2-(propan-2-ylidene)hydrazineyl)thiazole (**3f**)

# **Figure S19.** 1H NMR of the 4-fluoro-2-(2-(2-(propan-2-ylidene)hydrazineyl)thiazol-4-yl)phenol (**3g**)


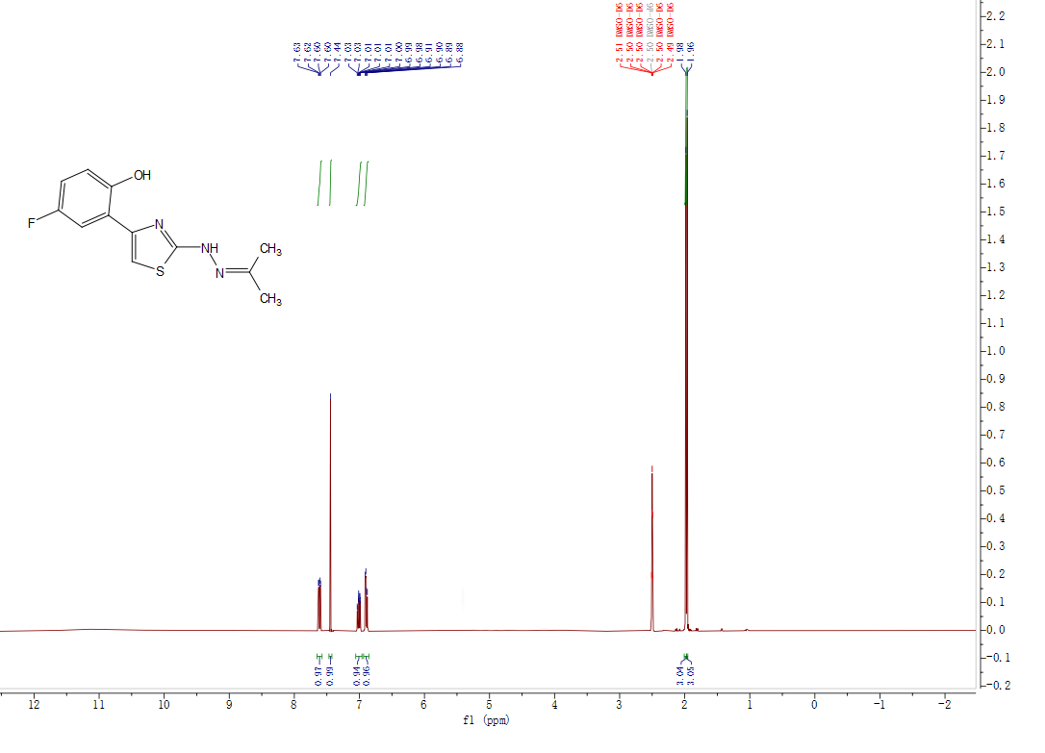


# **Figure S20.** 13C NMR of the 4-fluoro-2-(2-(2-(propan-2-ylidene)hydrazineyl)thiazol-4-yl)phenol (**3g**)


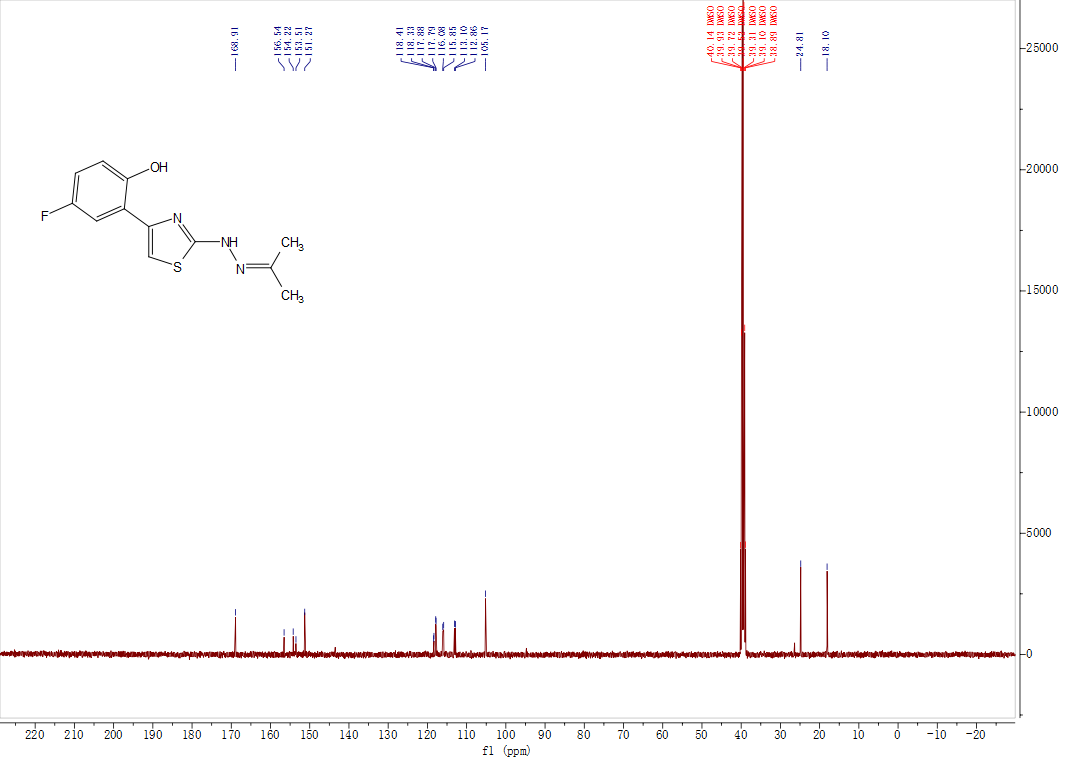


# **Figure S21.** HRMS of the 4-fluoro-2-(2-(2-(propan-2-ylidene)hydrazineyl)thiazol-4-yl)phenol (**3g**)

# **Figure S22.** 1H NMR of the 4-(3,4-dimethoxyphenyl)-2-(2-(propan-2-ylidene)hydrazineyl)thiazole (**3h**)


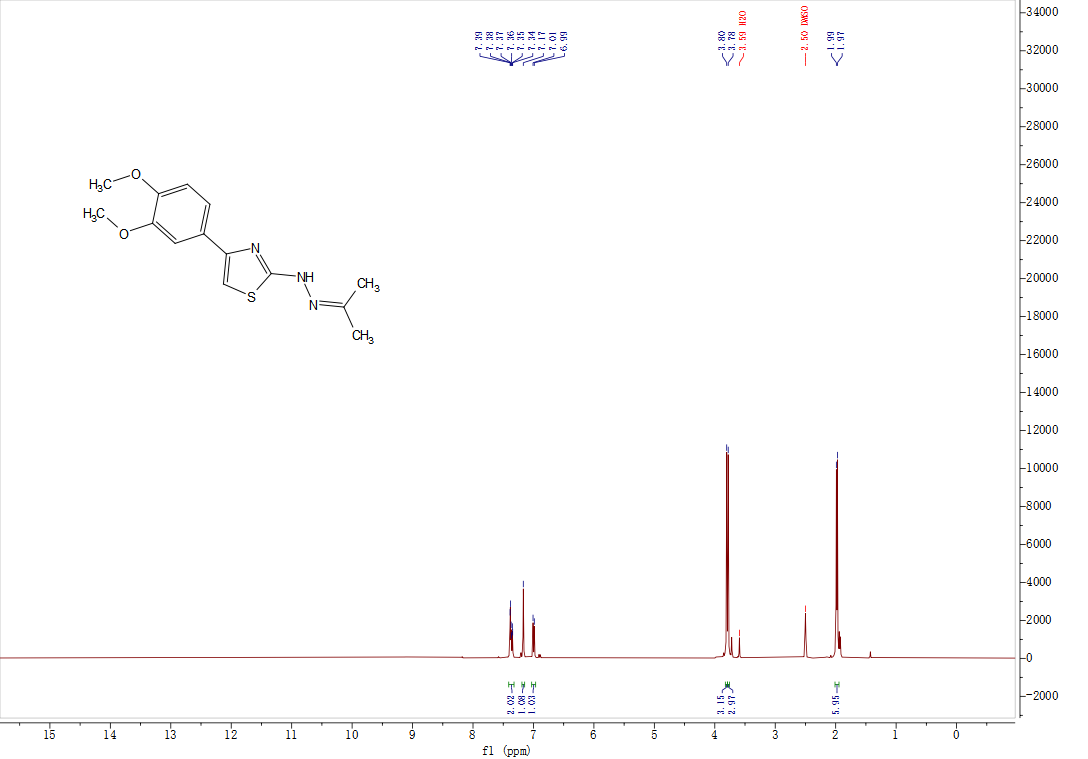


# **Figure S23.** 13C NMR of the 4-(3,4-dimethoxyphenyl)-2-(2-(propan-2-ylidene)hydrazineyl)thiazole (**3h**)


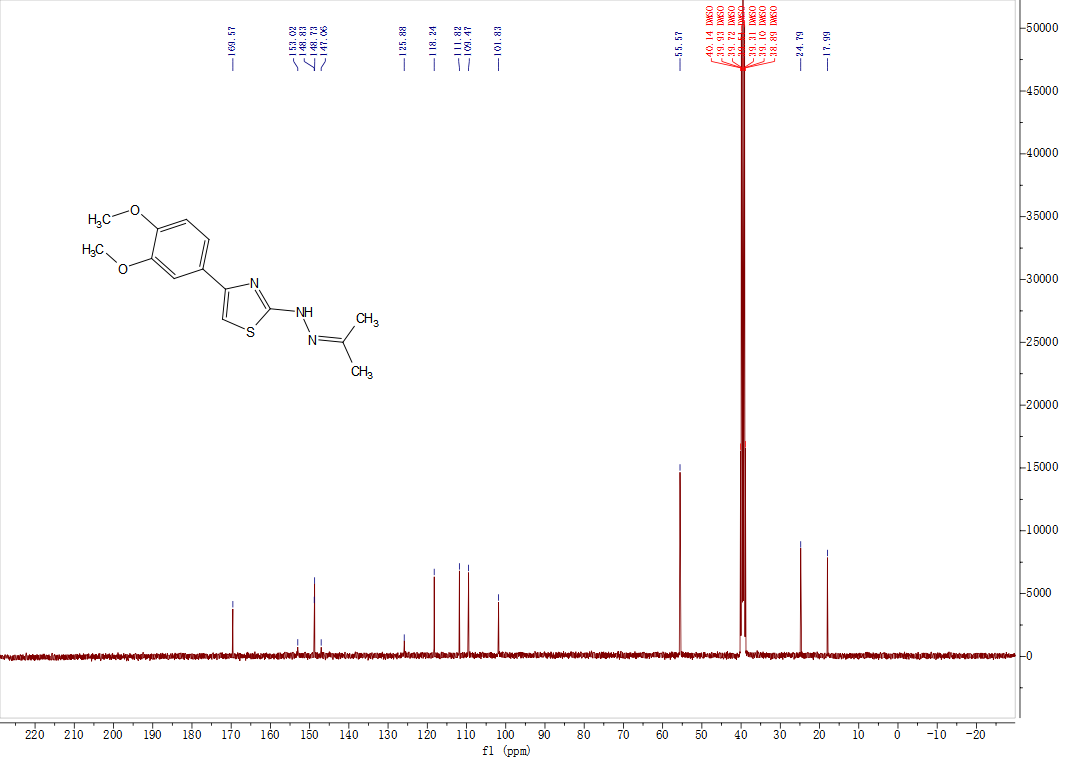


# **Figure S24.** HRMS of the 4-(3,4-dimethoxyphenyl)-2-(2-(propan-2-ylidene)hydrazineyl)thiazole (**3h**)

**Figure S25.** Antimelanogenic effects of compounds in B16F10 melanoma cells. (**A**) **3a**; (**B**) **3b**; (**C**) **3e**; (**D**) **3g**; (**E**) **3h**.Cells were stimulated with 100 nM α-MSH, and arbutin (100 μM) served as the positive control. Data are presented as mean ± SD from three independent experiments. Values are the mean SEM of triplicate experiments. **p* < 0.05; ***p* < 0.01.

| 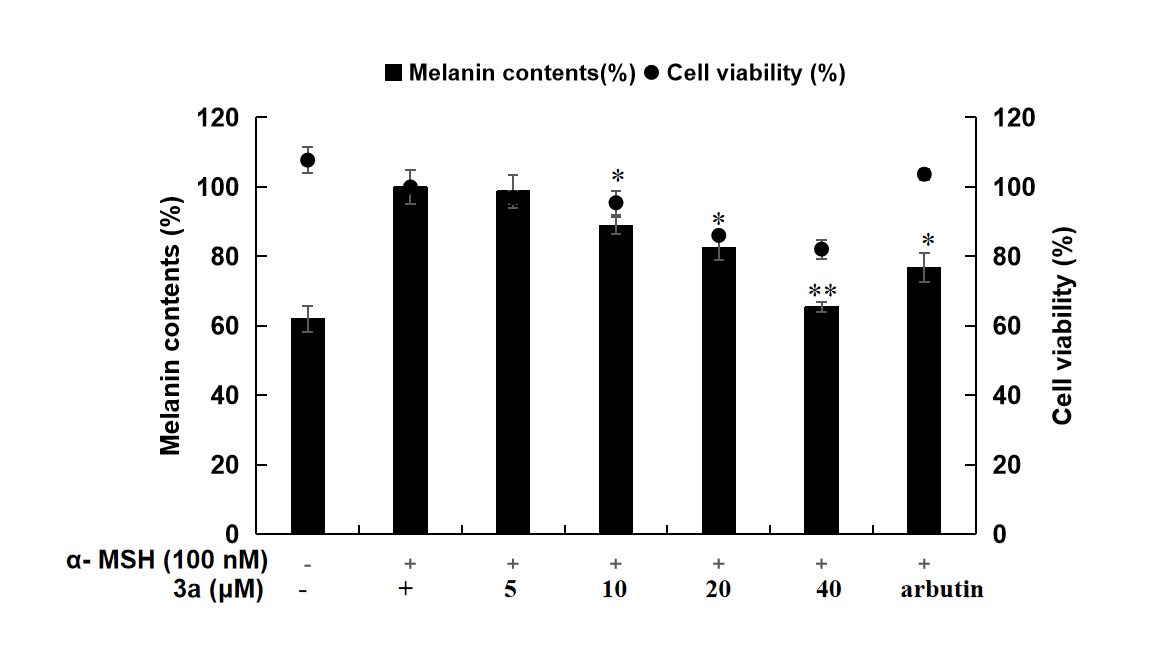 | 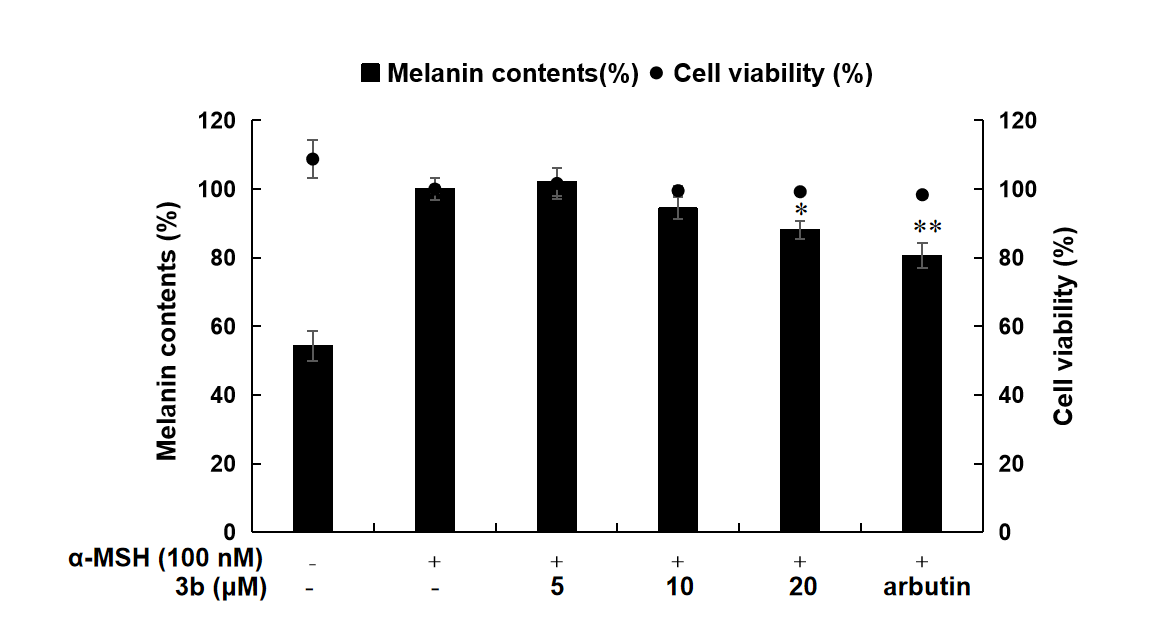 | 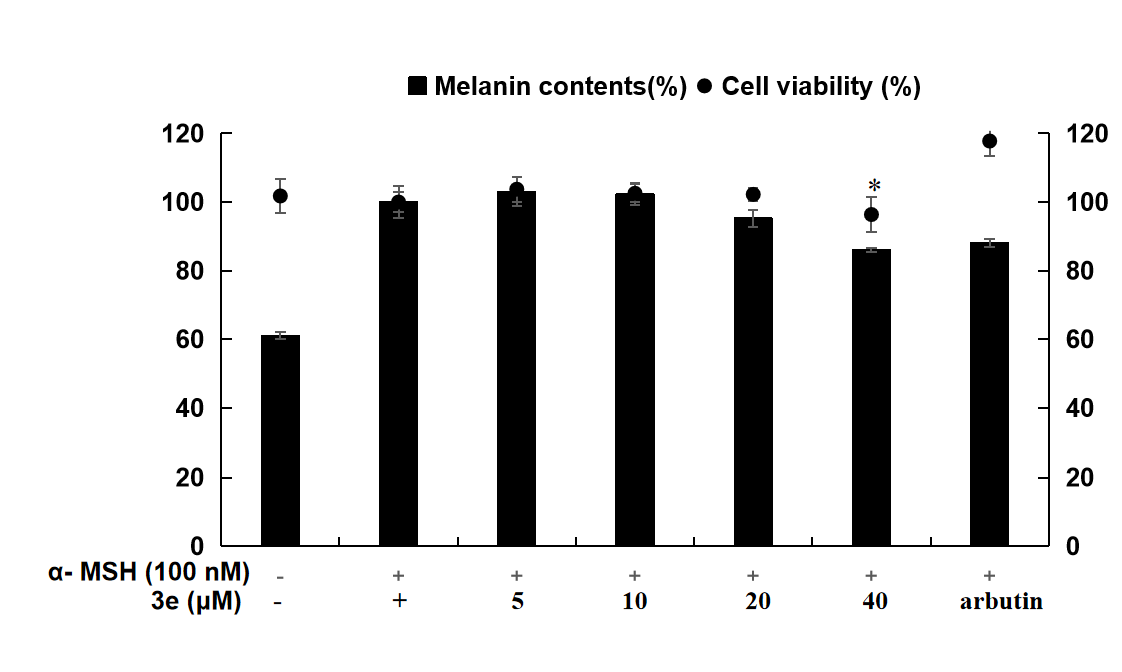 |
| --- | --- | --- |
| **A** | **B** | **C** |
| 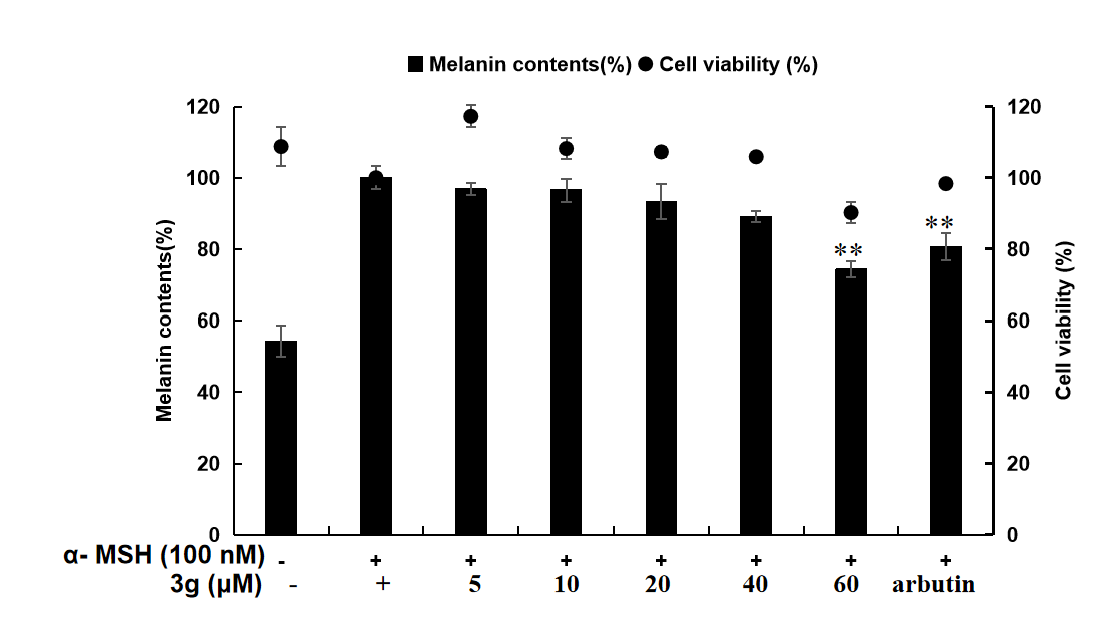 | 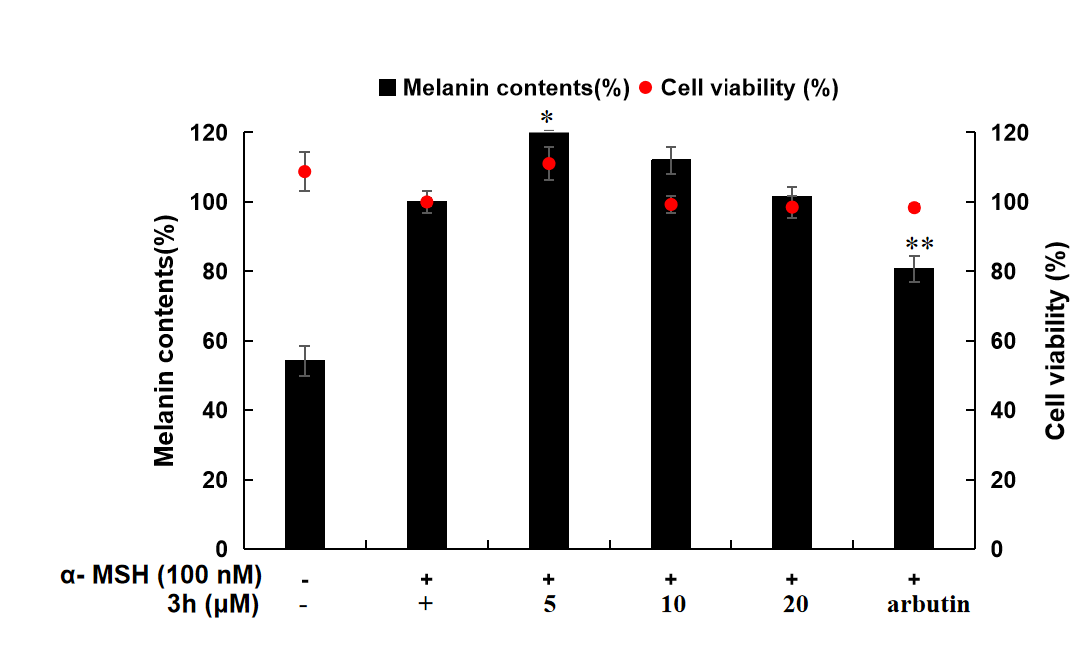 |  |
| **D** | **E** |  |

**Figure S26.** Synthesis compounds **3a**-**3h** on NO producton and cell viability in LPS-induced RAW 264.7macrophage cells. The cells were stimulated with 1 μg /mL of LPS only, or with LPS plus 3a-3h and L-NIL (positive control, 40 μM) for 24 h. The data represent the mean ±SD of triplicate experiments. Values are the mean SEM of triplicate experiments. **p* < 0.05; ***p* < 0.01


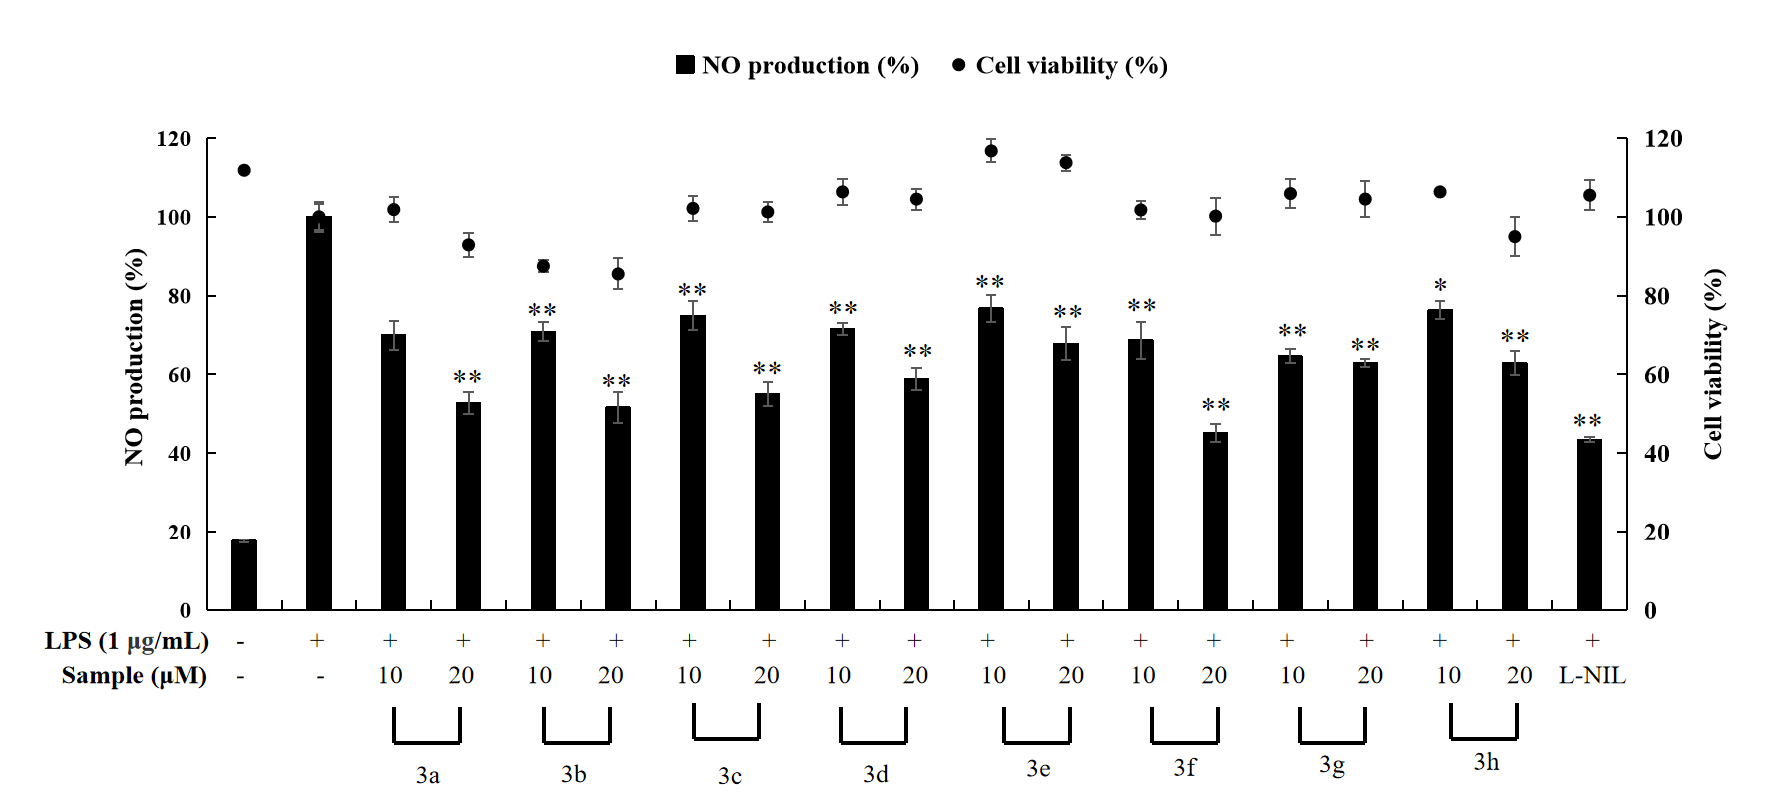


# **Figure S27.** The inhibition percentage of DPPH by the synthesized compounds


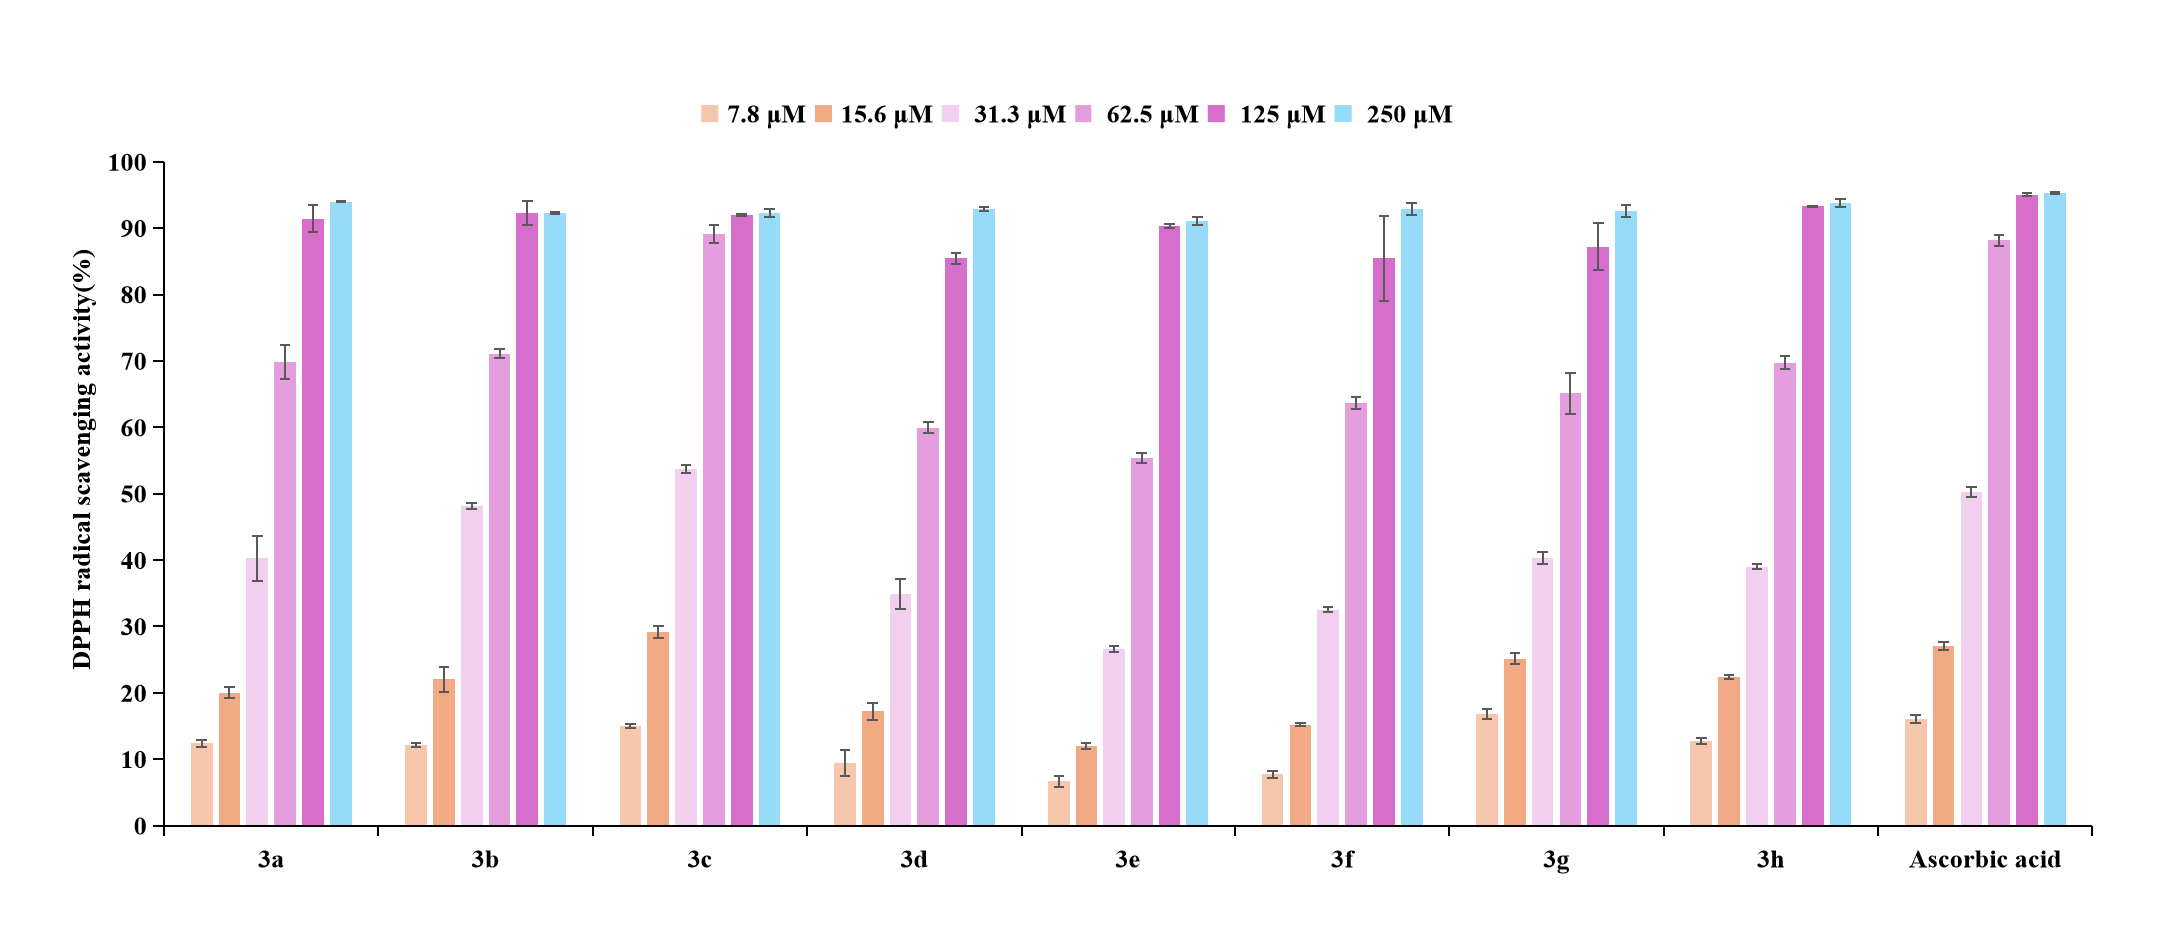


# **Figure S28.** HPLC chromatograms for stability evaluation of the synthesized compounds


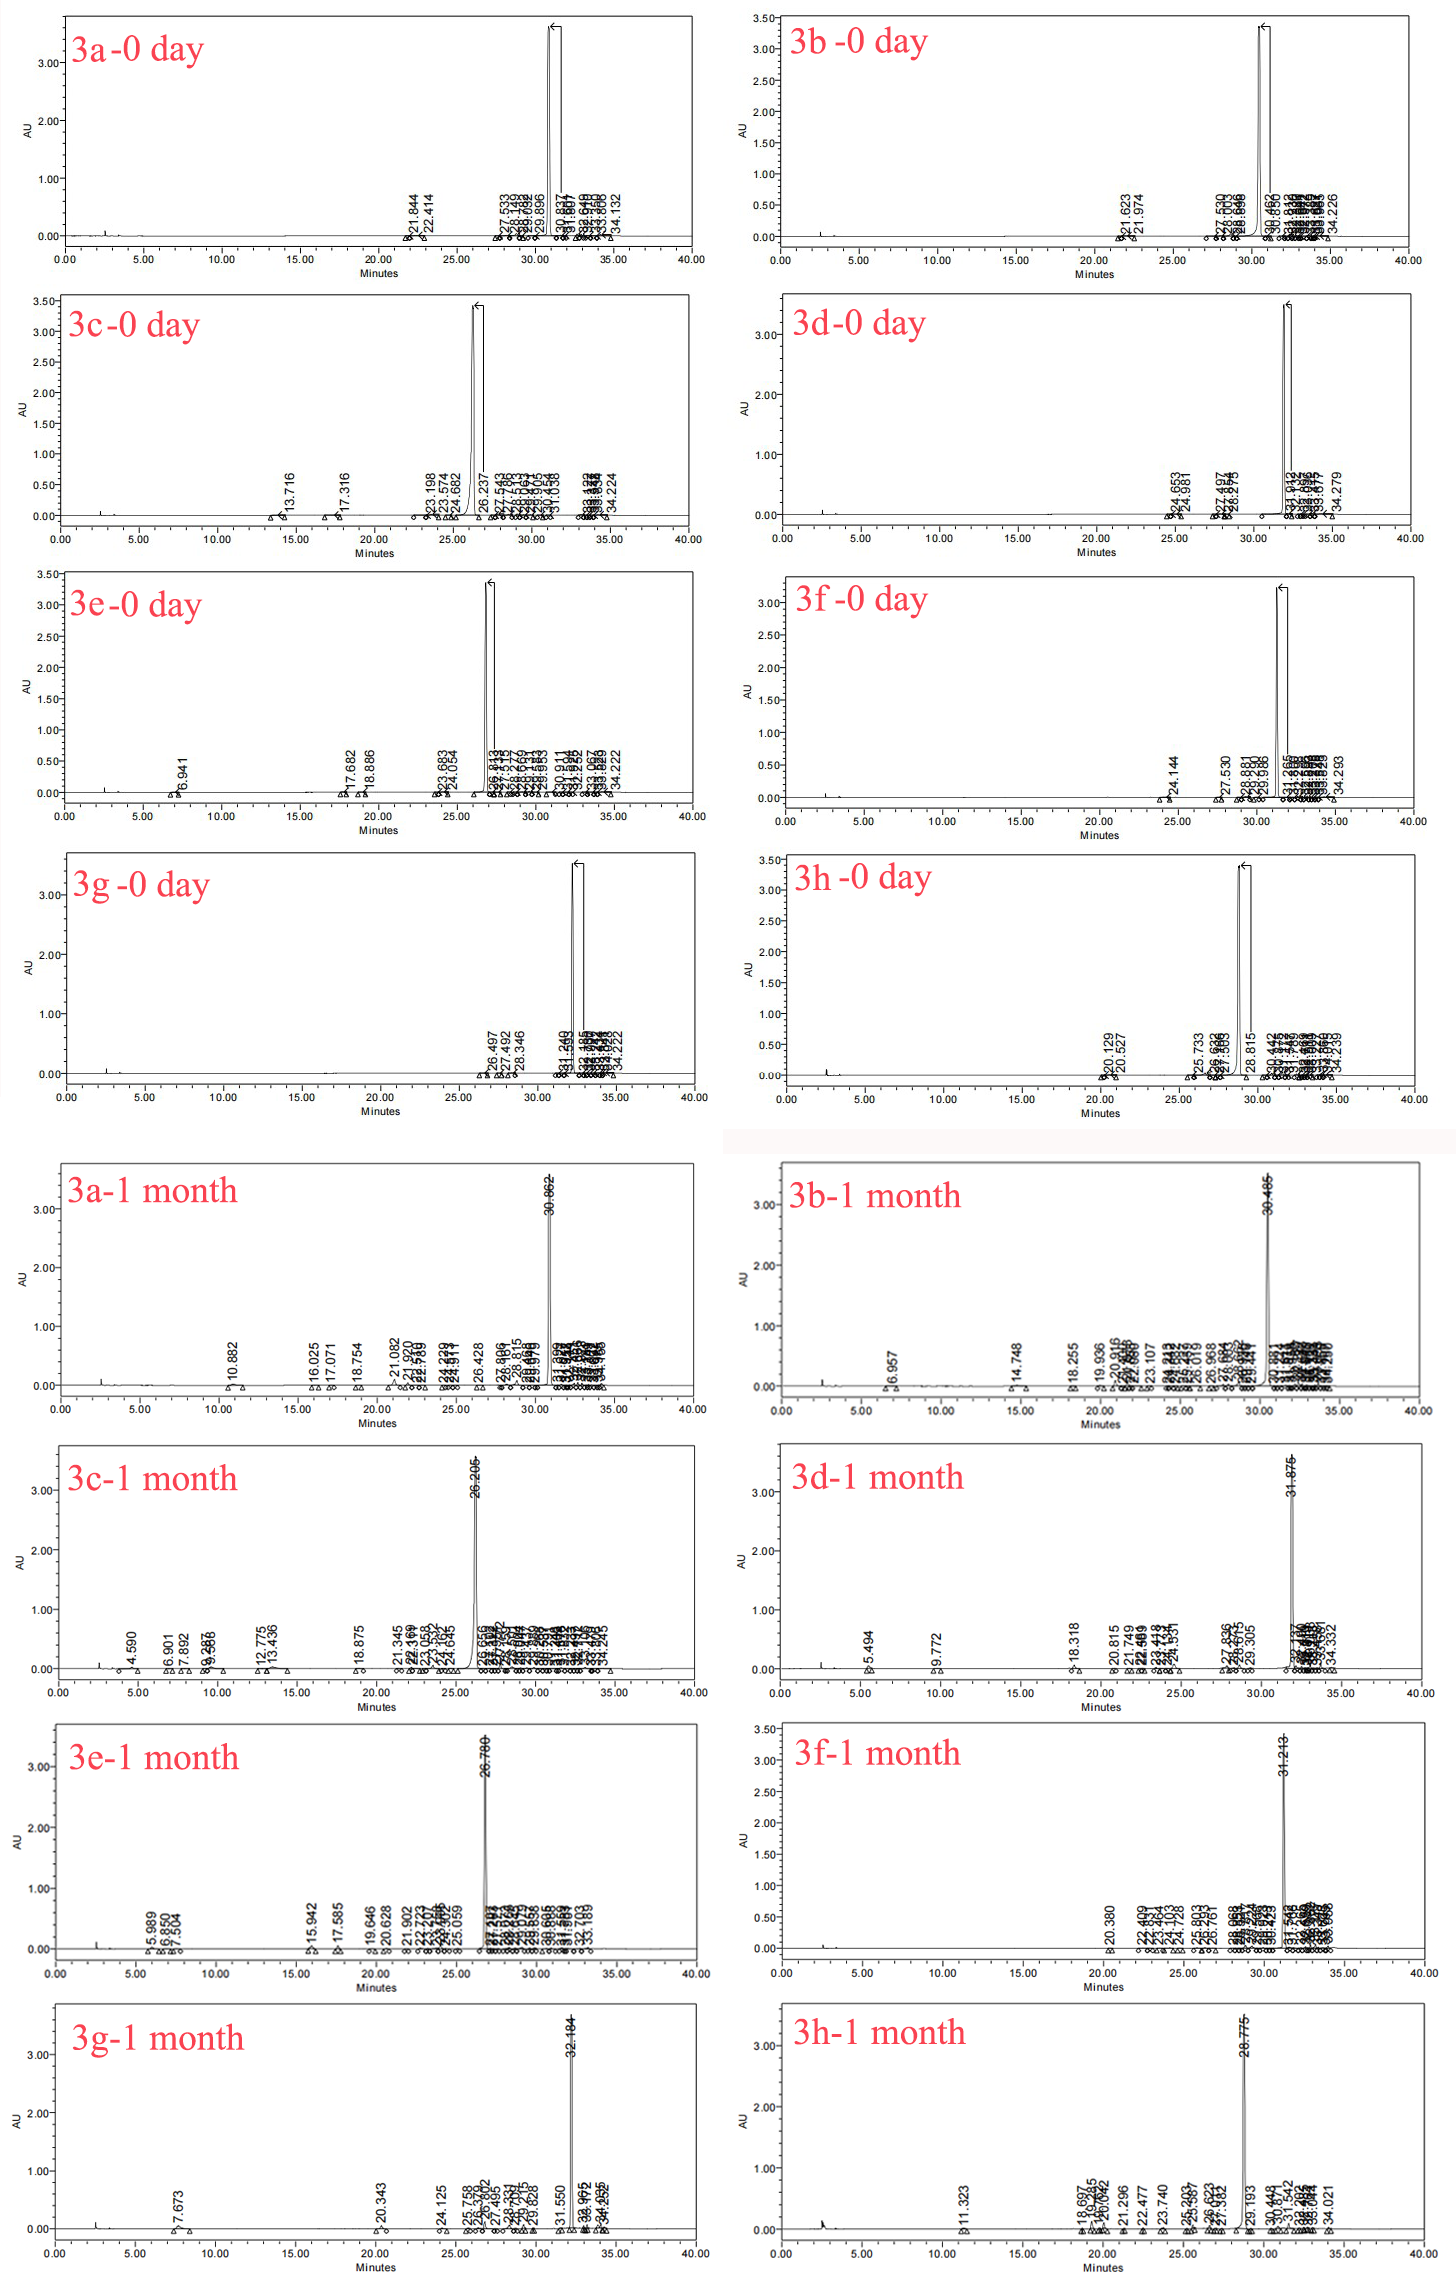

Supplement: Supplementary file 1 [file 6165becf6ea784a171967a22.docx]
